# Supplementary material for: Effects of aging on liver microcirculatory function and sinusoidal phenotype
Source: PubMed Central journal article supplement (PMC6260924; doi:10.1111/acel.12829), 2018-09-08

Young Old

A

Liver: Desmin staining

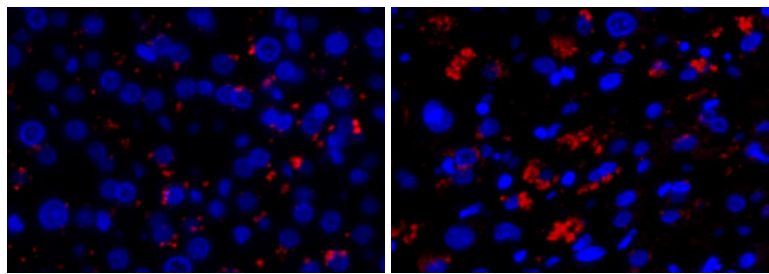

Young Old

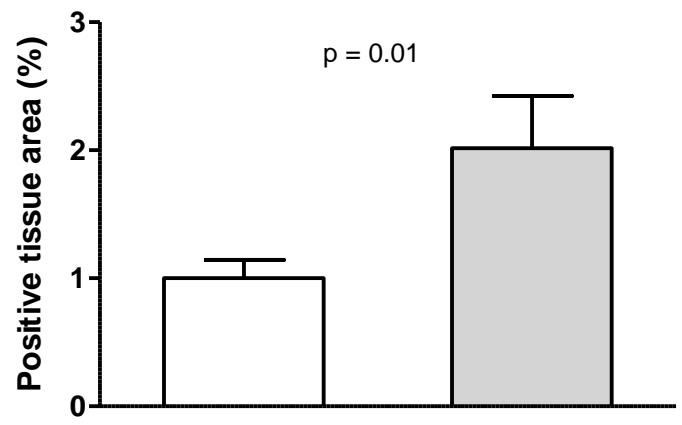

B

Liver:  $\alpha$ -SMA staining

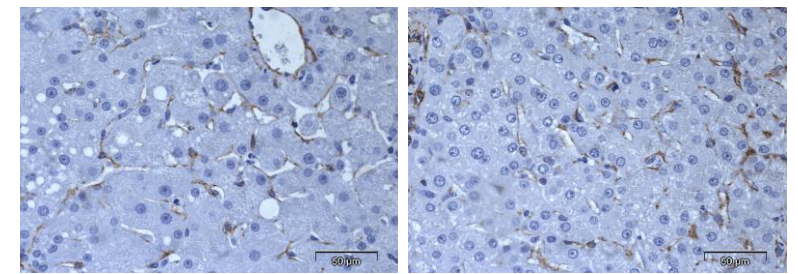

Young Old

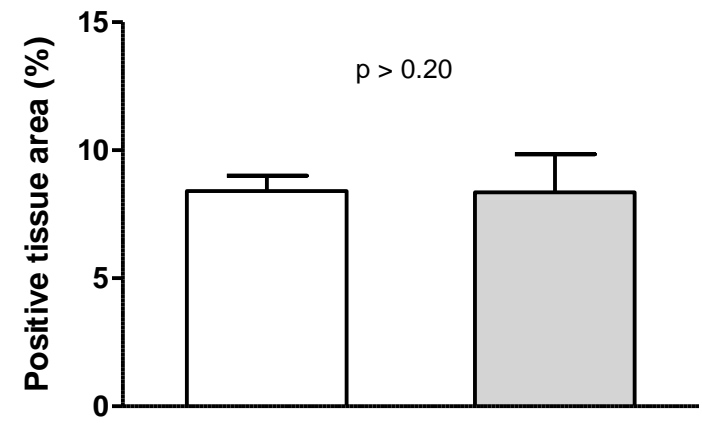

Supplement: ACEL-17-e12829-s004.pdf [file ACEL-17-e12829-s004.pdf]
