# Supplementary material for: Effects of aging on liver microcirculatory function and sinusoidal phenotype
Source: PubMed Central journal article supplement (PMC6260924; doi:10.1111/acel.12829), 2018-09-08

# Total hepatic tissue western blot

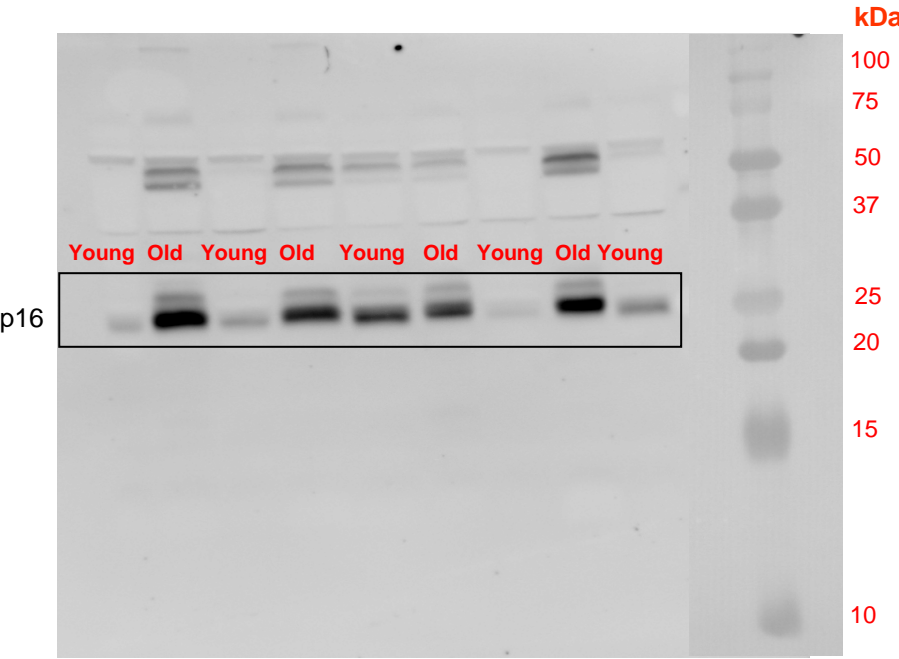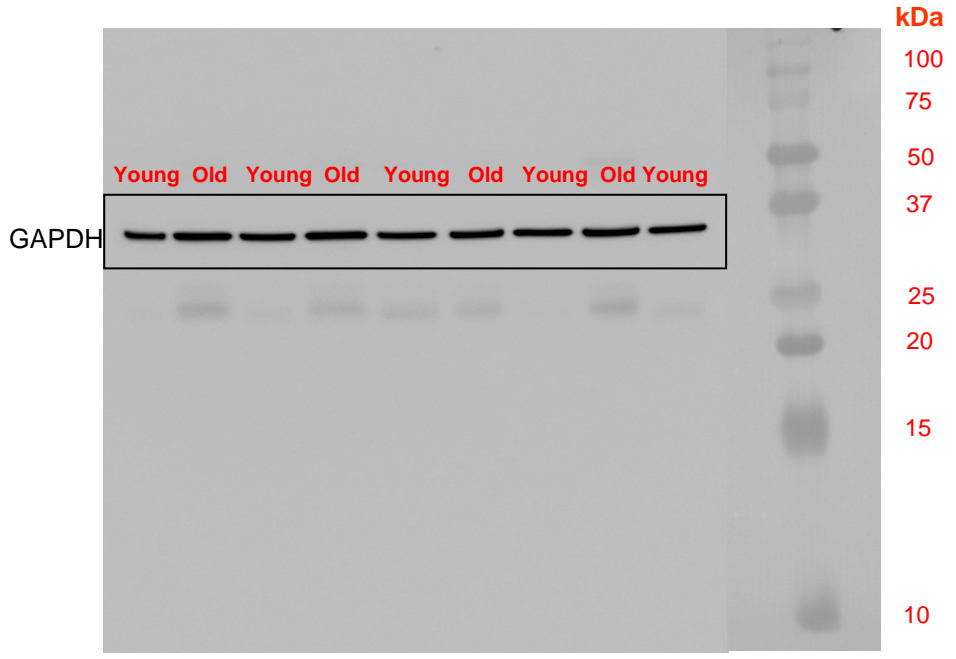

Supplement: ACEL-17-e12829-s006.pdf [file ACEL-17-e12829-s006.pdf]
